# Supplementary material for: New Constituents from the Leaves of Date Palm (Phoenix dactylifera L.) of Saudi Origin
Source: MDPI journal article supplement (doi:10.3390/molecules26144192), 2021-07-10
Supplement: s1 [file s1]

Supplementary data

**New Constituents from the Leaves of Date Palm (*Phoenix Dactylifera* L.) of Saudi Origin**

Rami K. Suleiman<sup>a\*</sup>, Wissam Iali<sup>b</sup>, Bassam El Ali<sup>b</sup>, Saviour A. Umoren<sup>a</sup>

<sup>a</sup> Interdisciplinary Research Center for Advanced Materials, King Fahd University of Petroleum & Minerals (KFUPM), Dhahran 31261, Saudi Arabia

<sup>b</sup> Chemistry Department, King Fahd University of Petroleum & Minerals, Dhahran 31261, Saudi Arabia

**Table S1:** Selected parameters of the conducted NMR experiments.

| Parameter                   | NMR Experiment |                 |                                      |                                     |
|-----------------------------|----------------|-----------------|--------------------------------------|-------------------------------------|
|                             | <sup>1</sup> H | <sup>13</sup> C | <sup>1</sup> H- <sup>13</sup> C HMBC | <sup>1</sup> H- <sup>1</sup> H COSY |
| Pulse Width (PW, in us)     | 14             | 9.6             | 14 for H and 9.6 for C               | 13.88                               |
| Level Power (PL1, in W)     | 7.7            | 36.45           | 7.7 for H and 36.45 for C            | 7.7                                 |
| Relaxation Delay (D1, in s) | 3              | 10              | 1.5                                  | 1.5                                 |
| Acquisition Time (AQ, in s) | 4              | 1.4             | 0.13                                 | 0.13                                |
| Receive gain (RG)           | 51             | 203             | 203                                  | 203                                 |
| Number of scans (NS)        | 16             | 16000           | 16                                   | 2                                   |
| Temperature (in K)          | 298            | 298             | 298                                  | 298                                 |

11 March 2021

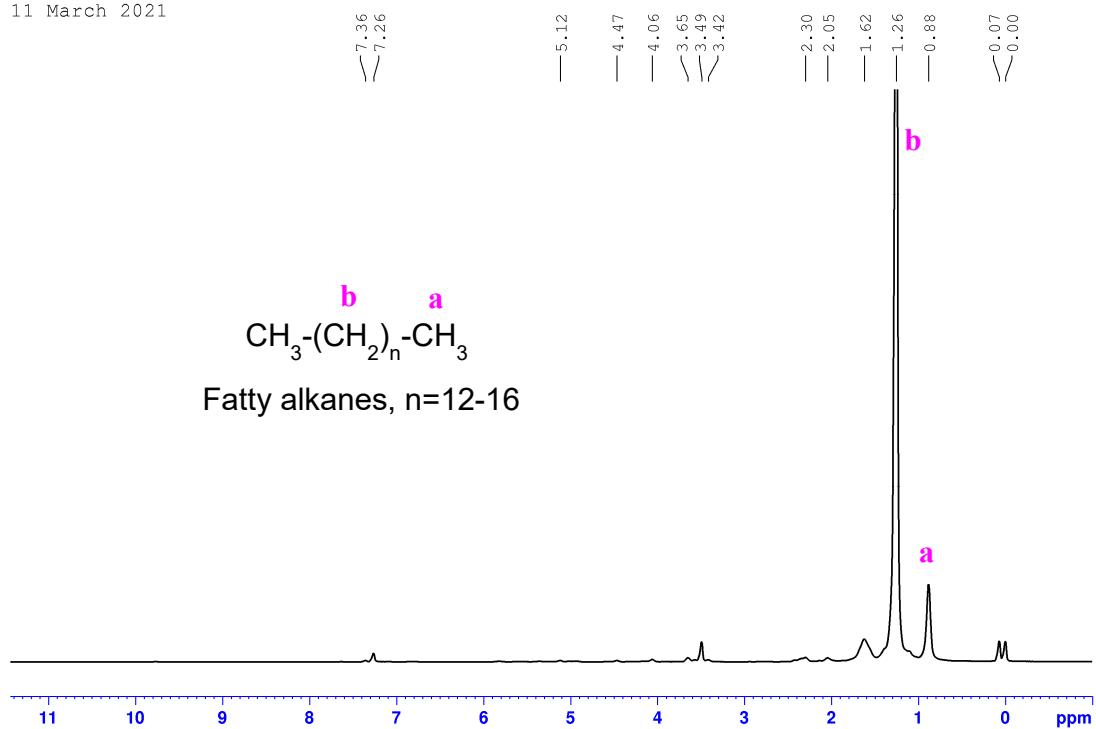

**Figure S1.**  $^1\text{H}$  NMR spectrum of the solid of F1.

11 March 2021

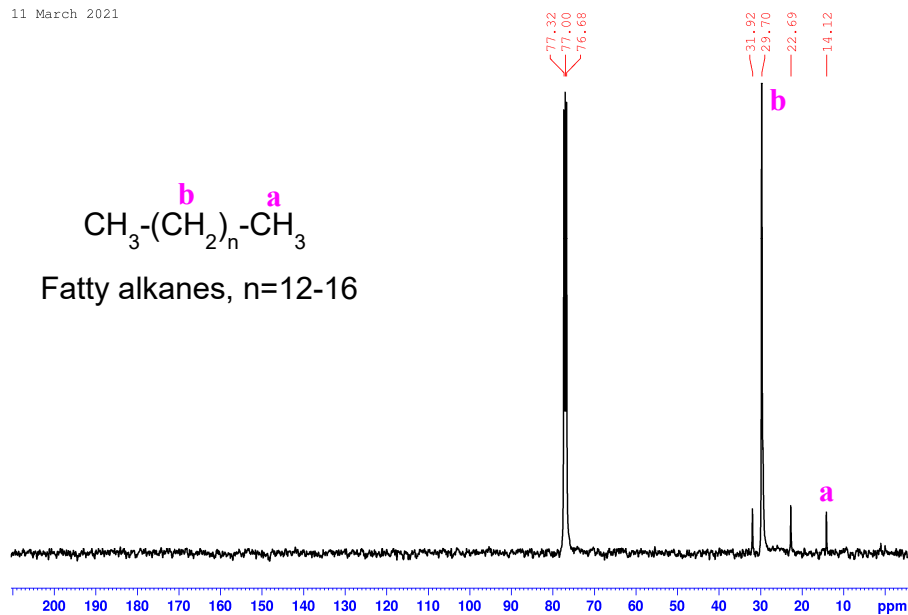

**Figure S2.**  $^{13}\text{C}$  NMR spectrum of the solid of F1.

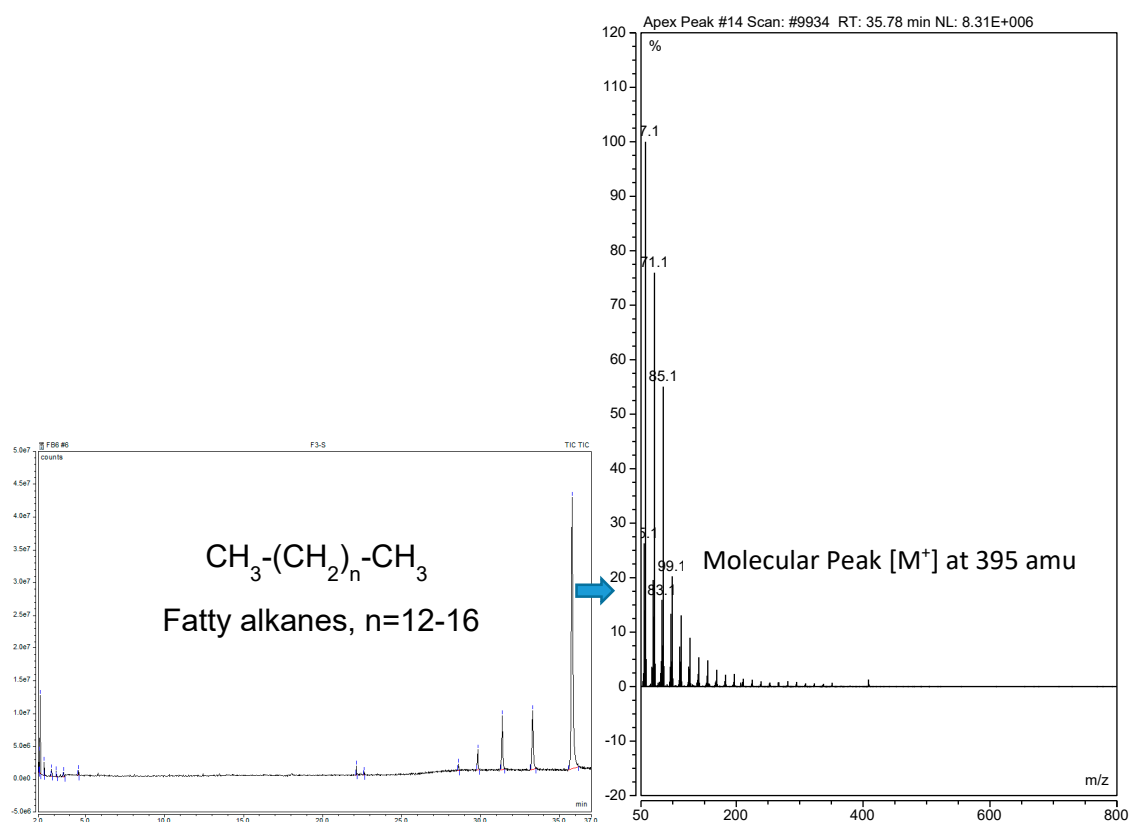

**Figure S3.** GC-MS Chromatogram of the solid of F1 (left) and the MS data of the highest-area peak (right).

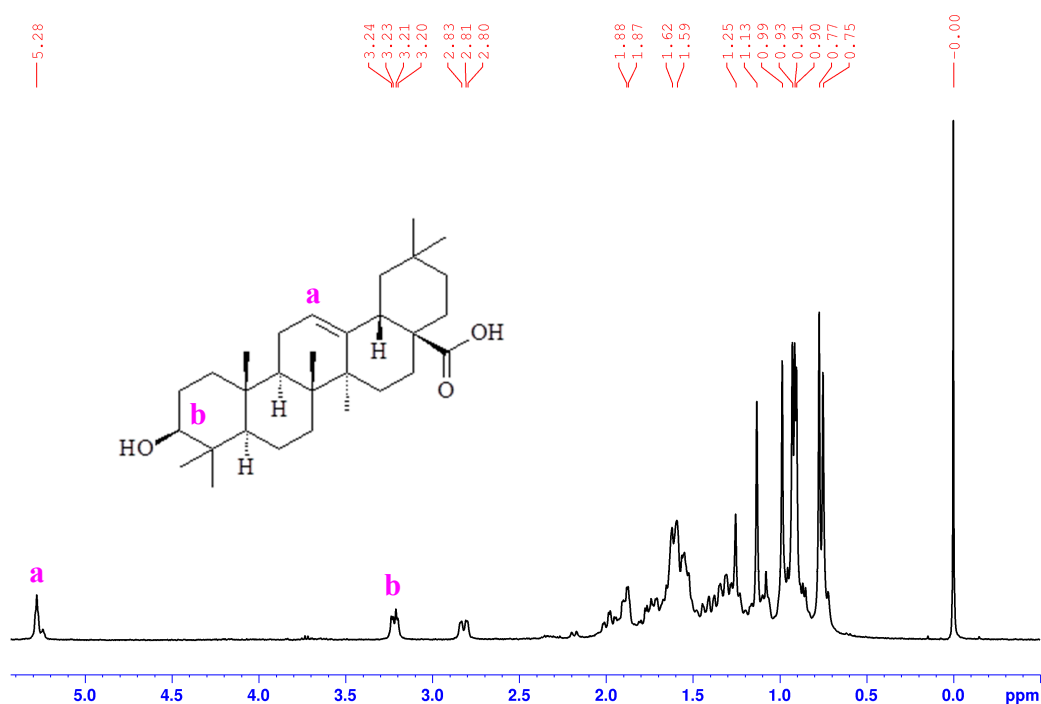

**Figure S4.** <sup>1</sup>H NMR spectrum of oleanolic acid.

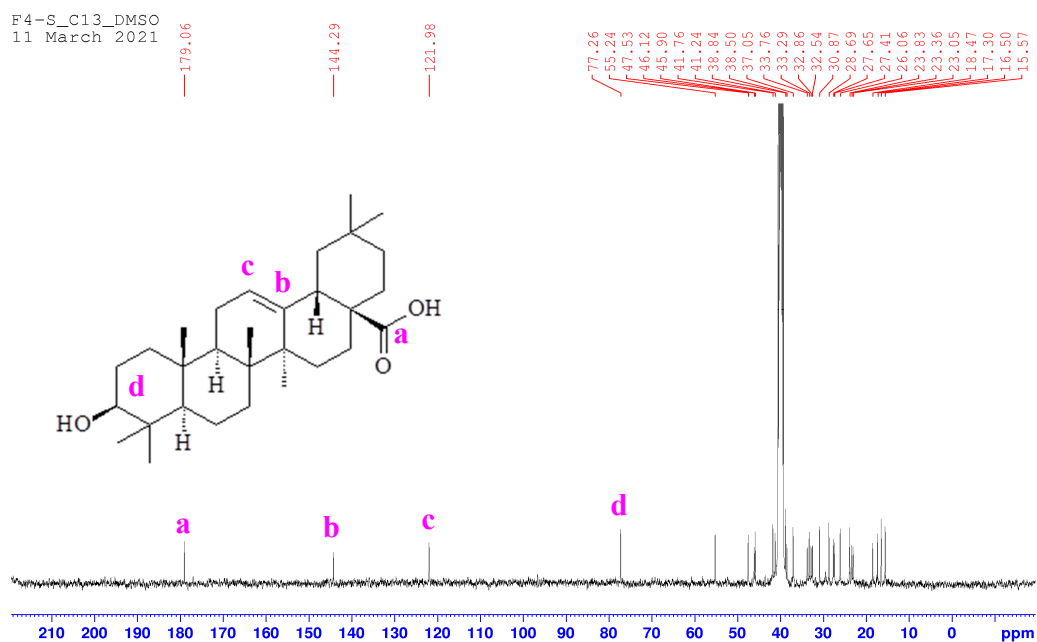

**Figure S5.** <sup>13</sup>C NMR spectrum of oleanolic acid.

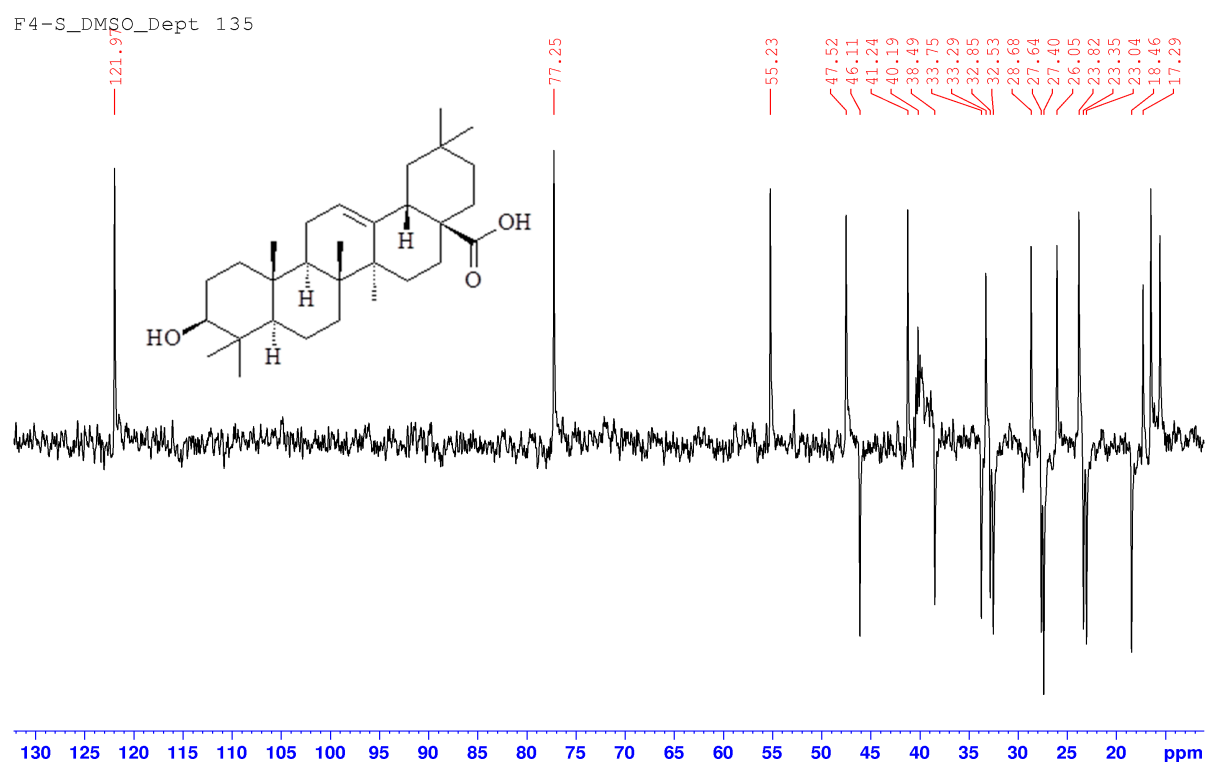

**Figure S6.** DEPT-135 NMR spectrum of oleanolic acid.

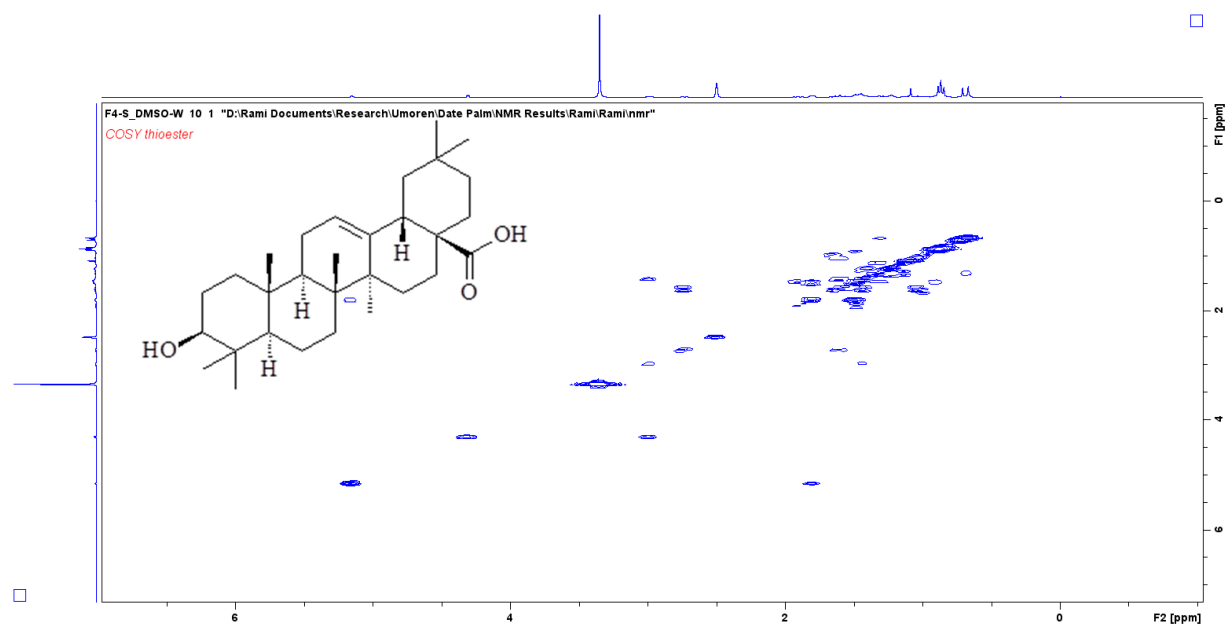

**Figure S7.**  $^1\text{H}$ - $^1\text{H}$  COSY NMR spectrum of oleanolic acid.

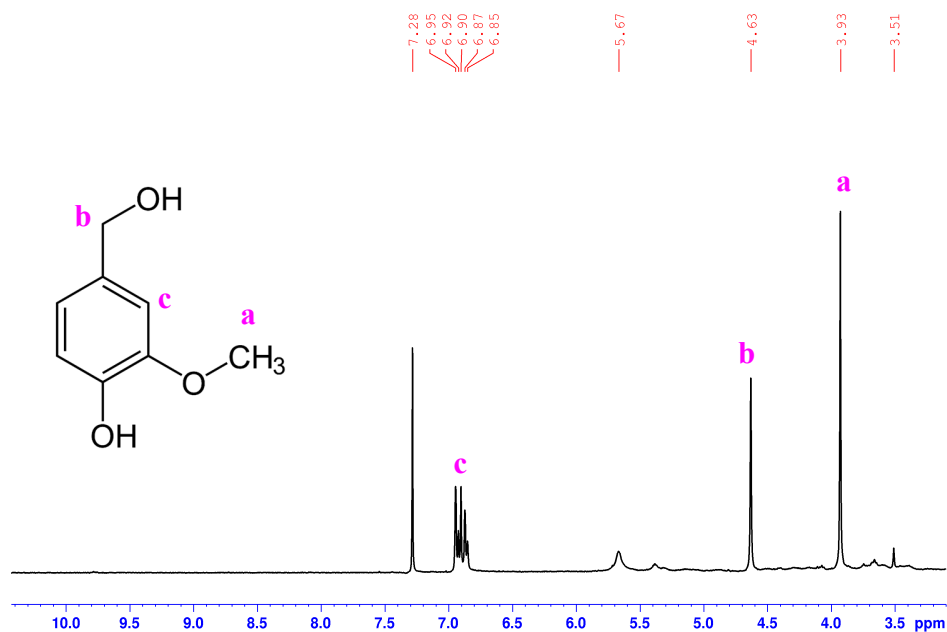

**Figure S8.** <sup>1</sup>H NMR spectrum of vanillyl alcohol.

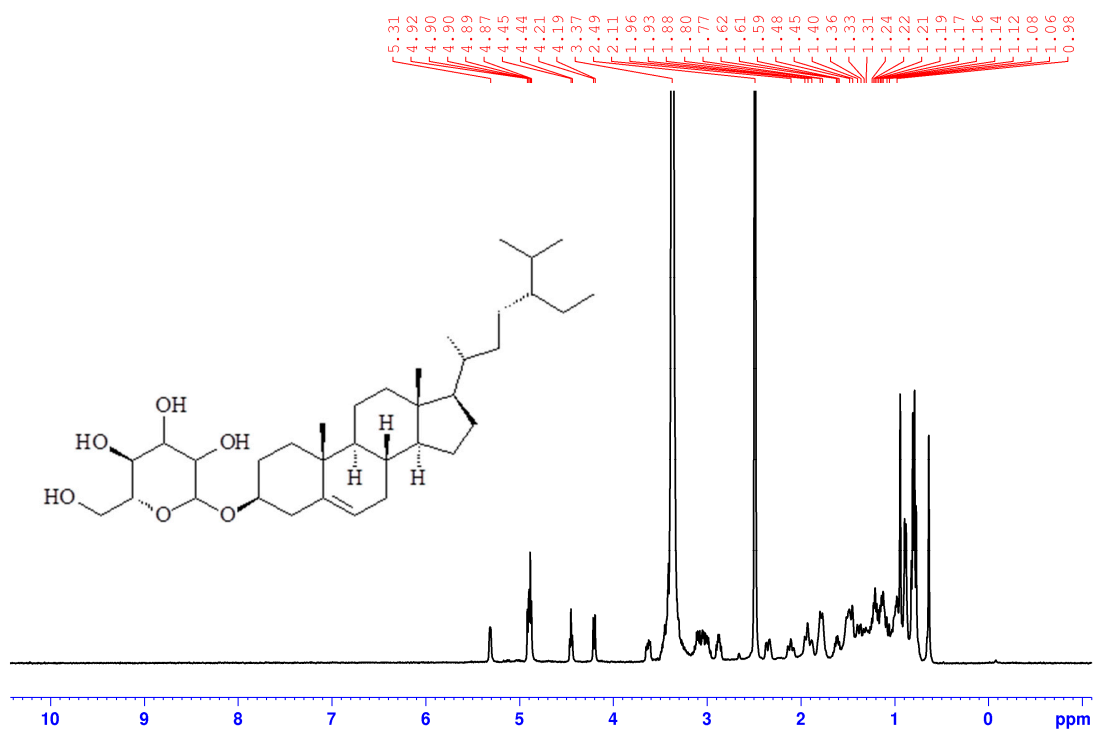

**Figure S9.** <sup>1</sup>H NMR spectrum of  $\beta$ -Sitosterol-3-O- $\beta$ -D-glucoside.

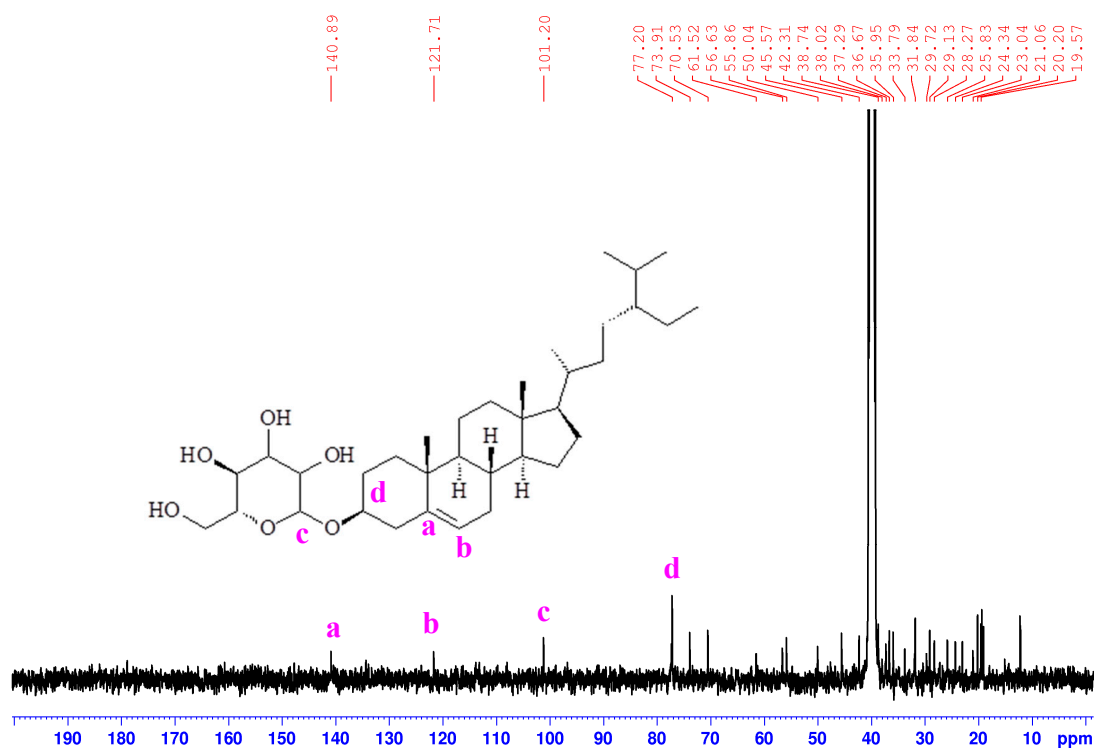

**Figure S10.** <sup>13</sup>C NMR spectrum of  $\beta$ -Sitosterol-3-O- $\beta$ -D-glucoside.

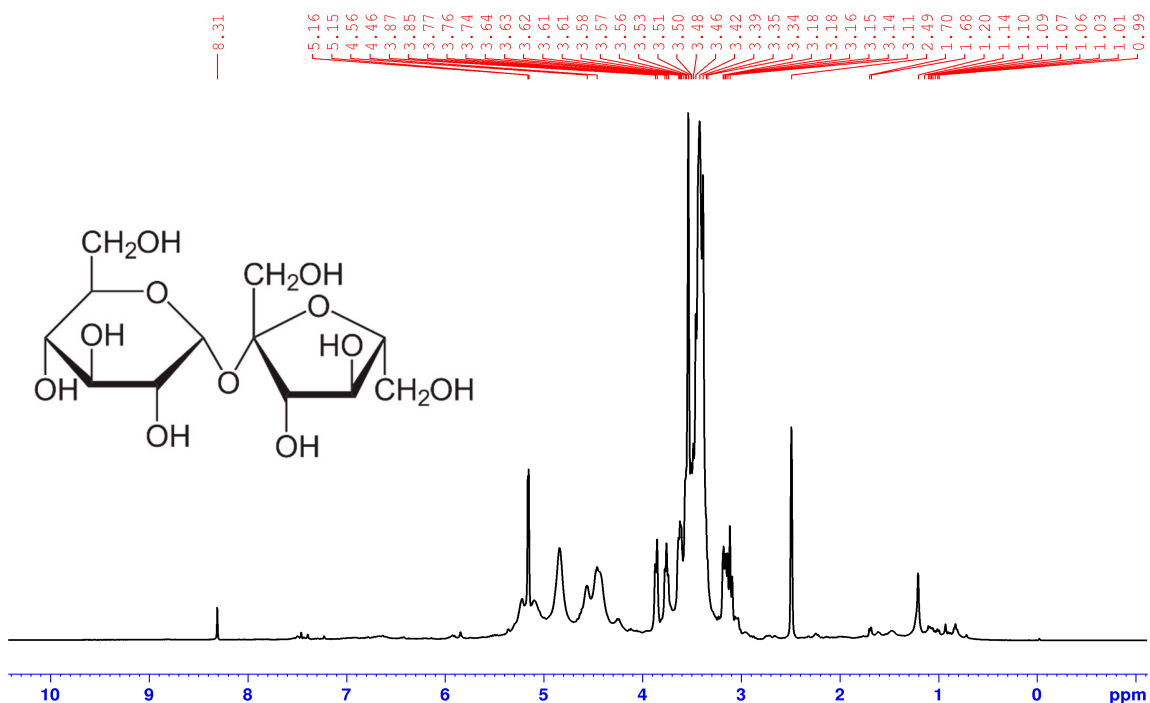

**Figure S11.** <sup>1</sup>H NMR spectrum of Sucrose.

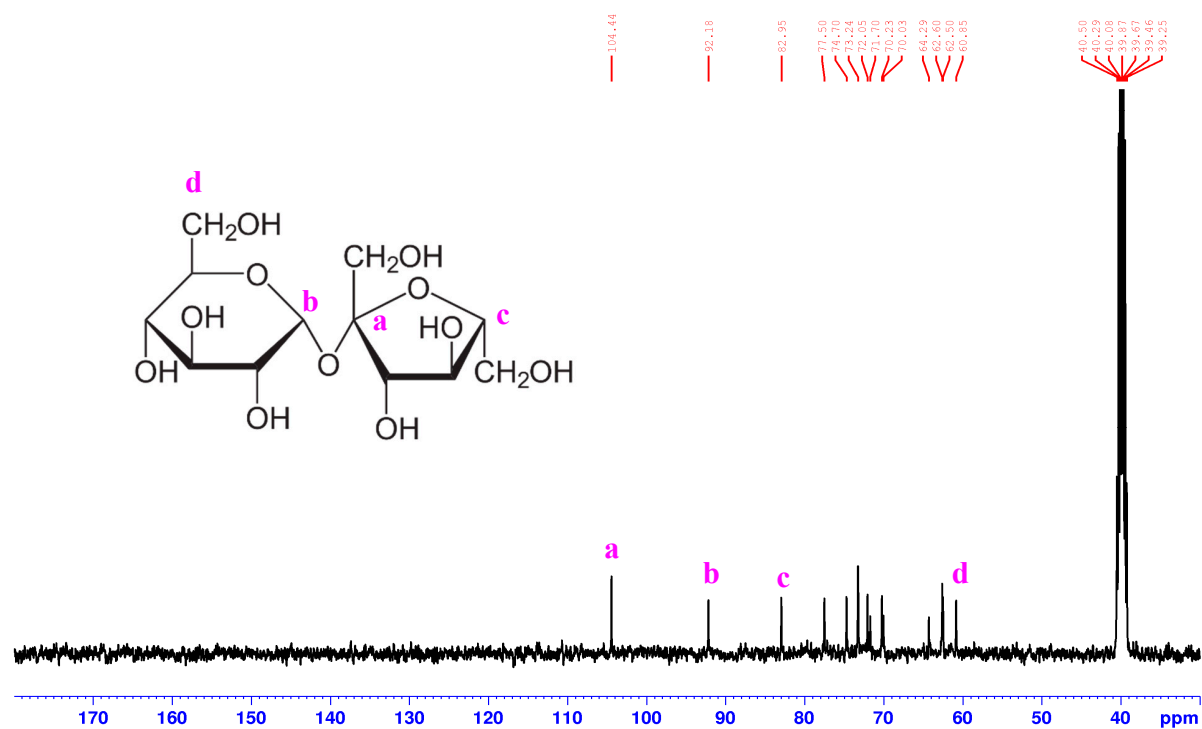

**Figure S12.** <sup>13</sup>C NMR spectrum of Sucrose.

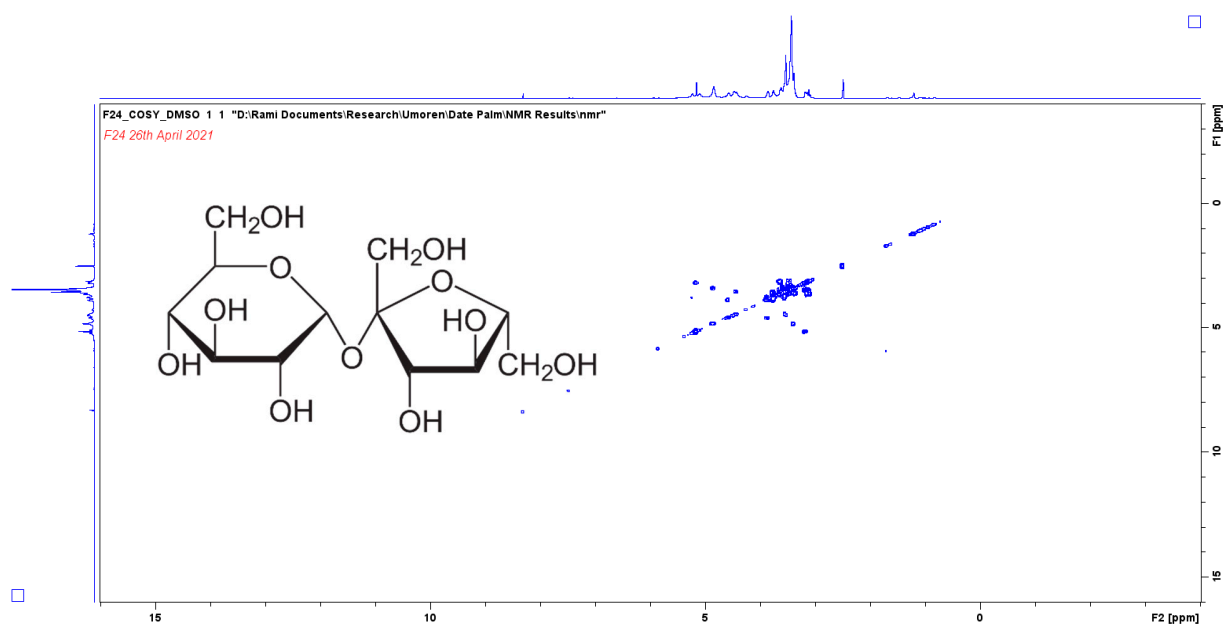

**Figure S13.** <sup>1</sup>H-<sup>1</sup>H COSY NMR spectrum of Sucrose.



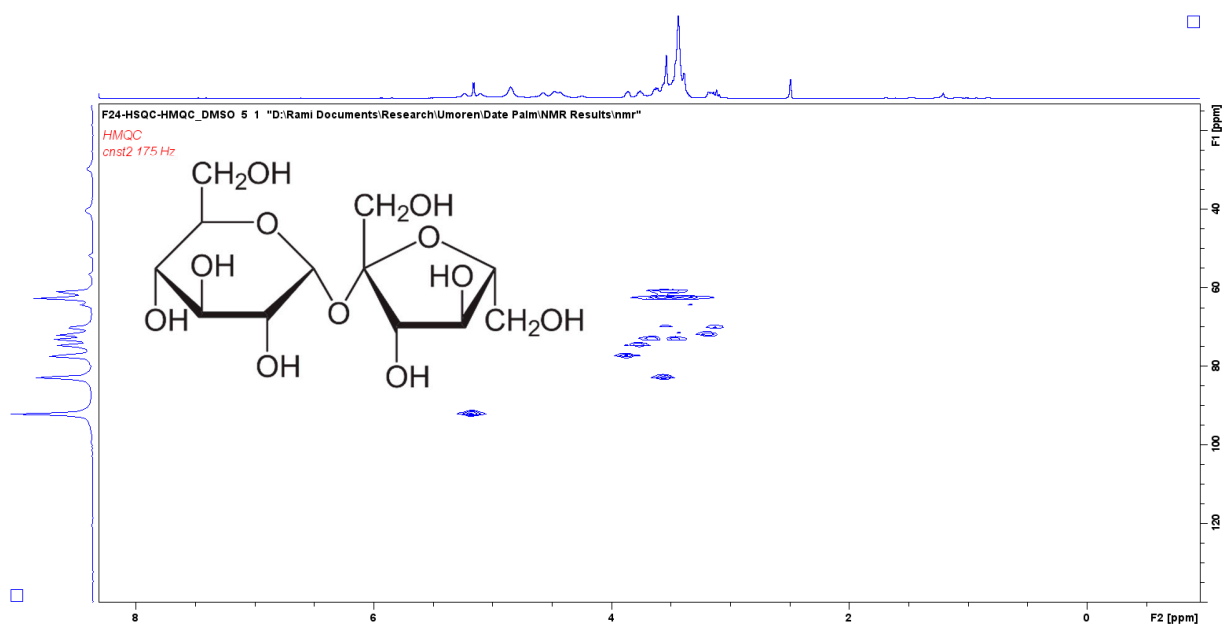

**Figure S14.**  $^1\text{H}$ - $^{13}\text{C}$  HMQC NMR spectrum of Sucrose.

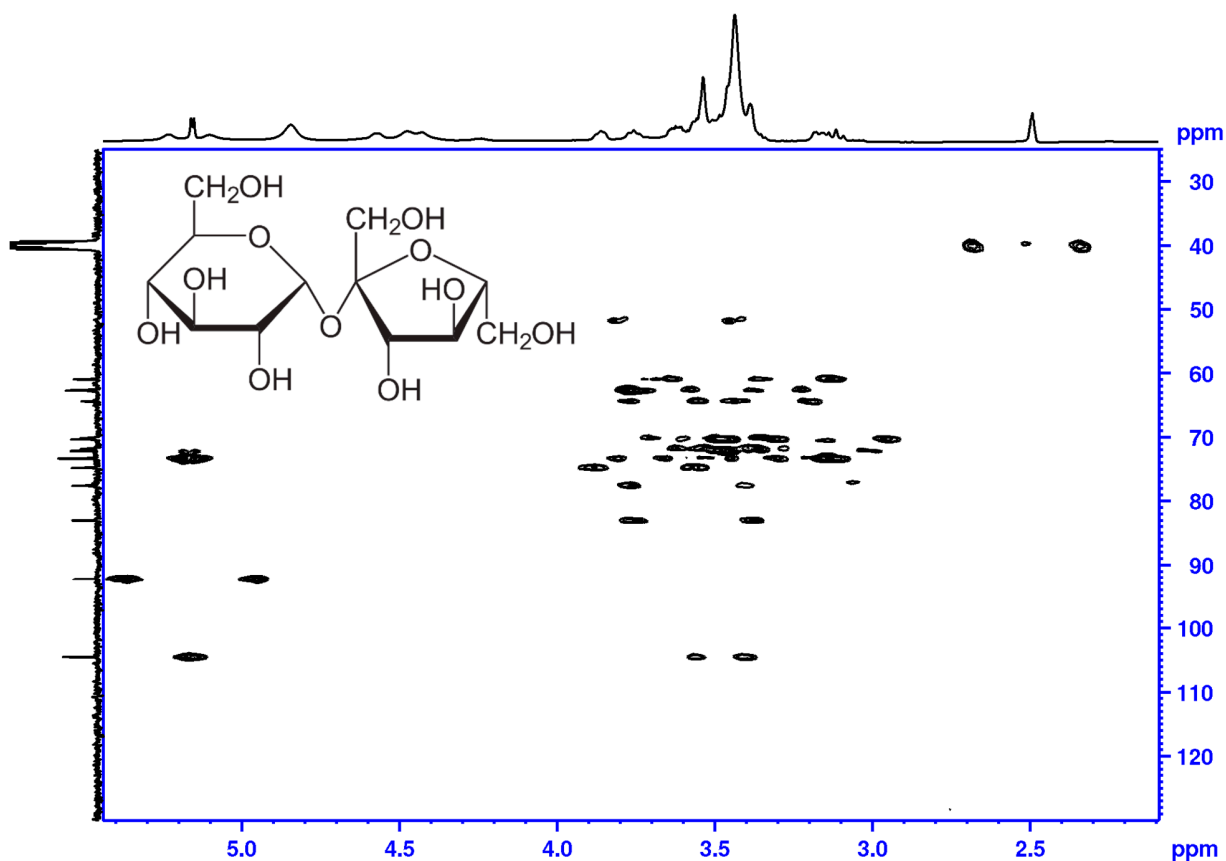

**Figure S15.**  $^1\text{H}$ - $^{13}\text{C}$  HMBC NMR spectrum of Sucrose.
